# Supplementary material for: How Rossby wave breaking modulates the water cycle in the North Atlantic trade wind region
Source: Copernicus journal article supplement (doi:10.5194/wcd-2-281-2021), 2021-03-29
Supplement: Supplementary file 1 [file wcd-2-281-2021-supplement.zip]

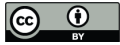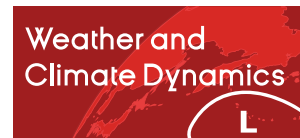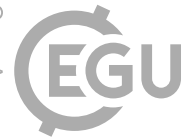

## *Supplement of*

# **How Rossby wave breaking modulates the water cycle in the North Atlantic trade wind region**

**Franziska Aemisegger et al.**

*Correspondence to:* Franziska Aemisegger ([franziska.aemisegger@env.ethz.ch](mailto:franziska.aemisegger@env.ethz.ch))

- [wcd-2-281-2021-supplement-title-page.pdf](#)
- [wcd-2020-51-supplement](#)
  - [Supplementary\\_material\\_S1\\_Lagrangian\\_moisture\\_source\\_diagnostics.pdf](#)
  - [Supplementary\\_material\\_S2\\_North\\_Atlantic\\_atmospheric\\_circulation\\_anomalies\\_isoTrades.pdf](#)
  - [Supplementary\\_material\\_S3\\_daily\\_cloud\\_patterns\\_MODIS\\_TERRA\\_with\\_trajectories.pdf](#)
  - [Supplementary\\_material\\_S4\\_animation\\_event1\\_tradewinds.gif](#)
  - [Supplementary\\_material\\_S5\\_animation\\_event2\\_dryintrusion.gif](#)

The copyright of individual parts of the supplement might differ from the article licence.
