# Supplementary material for: How Rossby wave breaking modulates the water cycle in the North Atlantic trade wind region
Source: Copernicus journal article supplement (doi:10.5194/wcd-2-281-2021), 2021-03-29
Supplement: Supplementary file 4 [file wcd-2-281-2021-supplement.zip]

Archive with 7 entries (6 files):
- wcd-2-281-2021-supplement-title-page.pdf
- wcd-2020-51-supplement/
- wcd-2020-51-supplement/Supplementary_material_S3_daily_cloud_patterns_MODIS_TERRA_with_trajectories.pdf
- wcd-2020-51-supplement/Supplementary_material_S1_Lagrangian_moisture_source_diagnostics.pdf
- wcd-2020-51-supplement/Supplementary_material_S4_animation_event1_tradewinds.gif
- wcd-2020-51-supplement/Supplementary_material_S2_North_Atlantic_atmospheric_circulation_anomalies_isoTrades.pdf
- wcd-2020-51-supplement/Supplementary_material_S5_animation_event2_dryintrusion.gif
