# Supplementary figures and images for: How Rossby wave breaking modulates the water cycle in the North Atlantic trade wind region
Source: Copernicus journal article supplement (doi:10.5194/wcd-2-281-2021), 2021-03-29

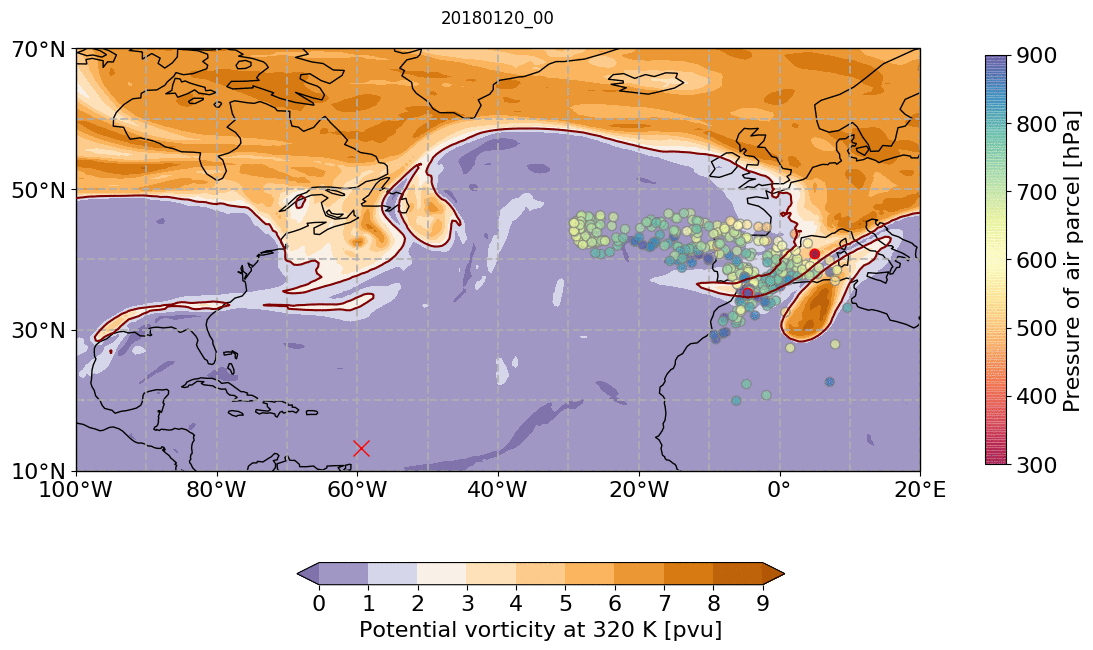

Supplement: Supplementary file 4 [file wcd-2-281-2021-supplement.zip › wcd-2020-51-supplement/Supplementary_material_S4_animation_event1_tradewinds.gif]

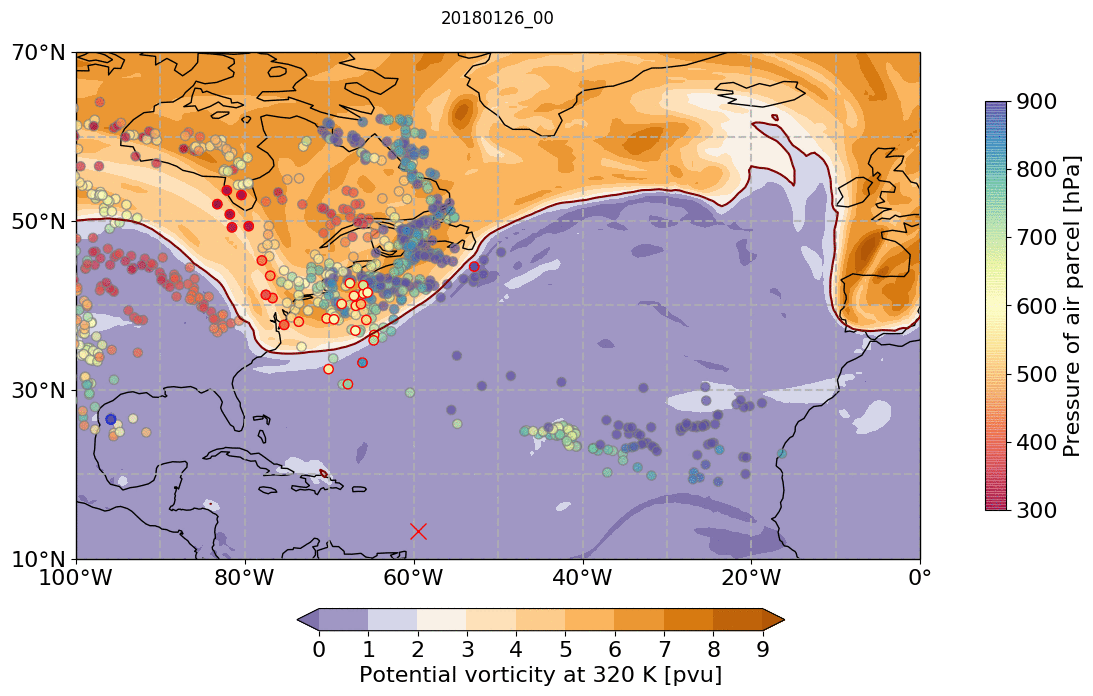

Supplement: Supplementary file 4 [file wcd-2-281-2021-supplement.zip › wcd-2020-51-supplement/Supplementary_material_S5_animation_event2_dryintrusion.gif]
